# Supplementary material for: DNA sequencing based on electronic tunneling in a gold nanogap: a first-principles study
Source: Royal Society of Chemistry journal article supplement (doi:10.1039/d1cp04910k), 2022-01-01
Supplement: d1cp04910k1.pdf [file d1cp04910k1.pdf]

## Supporting Information

# DNA sequencing based on electronic tunneling in gold nanogap: a first-principles study

*Hao Zou<sup>a</sup>, Shizheng Wen<sup>a,b</sup>, Xiaoyan Wu,<sup>d</sup> Ka-Wai Wong<sup>\*,c</sup> and ChiYung Yam<sup>\*,a,d</sup>*

<sup>a</sup>Beijing Computational Science Research Center, Haidian District, Beijing 100193,  
China

<sup>b</sup>Jiangsu Province Key Laboratory of Modern Measurement Technology and Intelligent  
Systems, School of Physics and Electronic Electrical Engineering, Huaiyin Normal  
University, Huaian 223300, China

<sup>c</sup>Genvida Technology Company Limited, Hong Kong, China

<sup>d</sup>Shenzhen JL Computational Science and Applied Research Institute, Shenzhen 518109,  
China

\*Email: ka-wai.wong@genvida.com, yamecy@csrc.ac.cn

## Atomic structure of Gap-Au

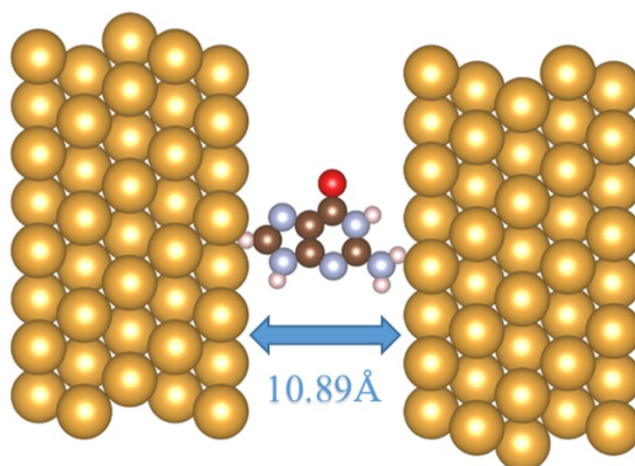

**Fig. S1** The atomic structure of the bare gold nanogap, with a gap size of 10.89 Å.

**Table S1.** Average currents of nucleobases in the three nanogaps

| I (nA) | Gap-Au    | Gap-AuS   | Gap-AuS'  |
|--------|-----------|-----------|-----------|
| G      | 4.761E-01 | 1.148E+00 | 3.164E-02 |
| A      | 9.741E-02 | 3.939E-02 | 4.710E-04 |
| C      | 3.180E-01 | 3.673E-01 | 5.264E-03 |
| T      | 1.092E-01 | 2.815E-03 | 7.693E-06 |

## Effect of gap size on total energy for Gap-AuS

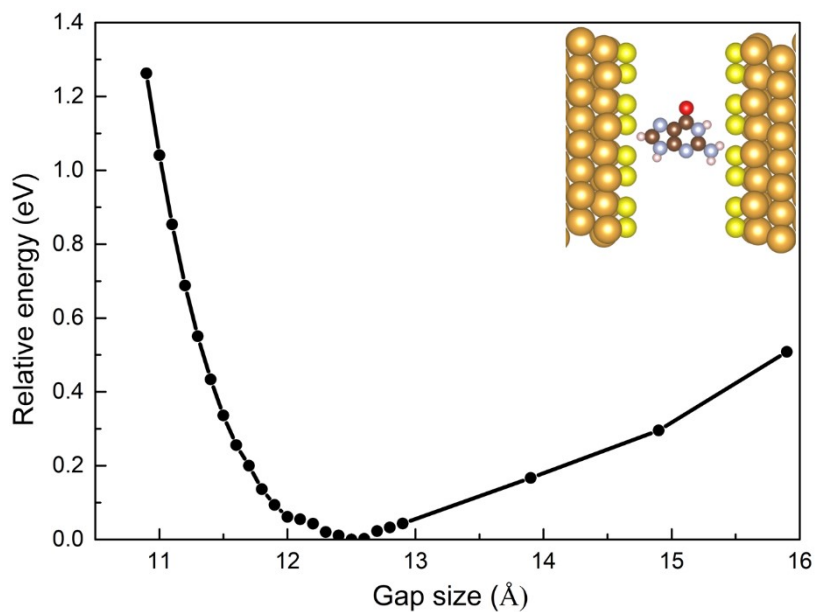

**Fig S2.** Total energy of Gap-AuS versus nanogap size.

We keep the orientation of guanine in Gap-AuS with the highest conductivity and vary the size of nanogap. We denote the nanogap as Gap-AuS' where the system is found to be most stable. Fig S2 plots the total energy as a function of the nanogap size and the minimum energy is found when the gap size is 12.49 Å. In this way, we maximize the residence time of guanine with the highest conductivity in Gap-AuS'.

## Electronic transport properties of Gap-AuS'

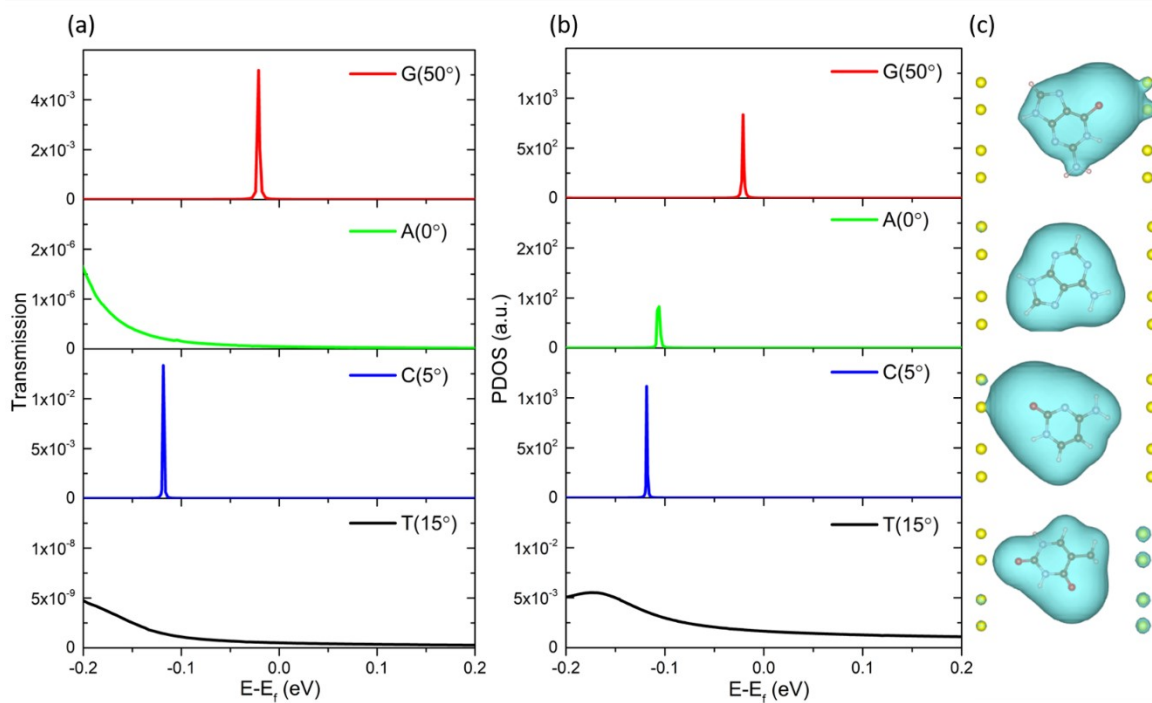

**Figure S3.** Transmission coefficients (a) and PDOS (b) of each nucleobase in Gap-AuS'.

DOS of electrodes is excluded for clarity. For each nucleobase, the orientation with the largest contribution to the average current is chosen for the analysis. (c) Isosurface plots of HOMOs of the four nucleobases with the nanogap.

## Difference in electrostatic energy between Gap-Au and Gap-AuS

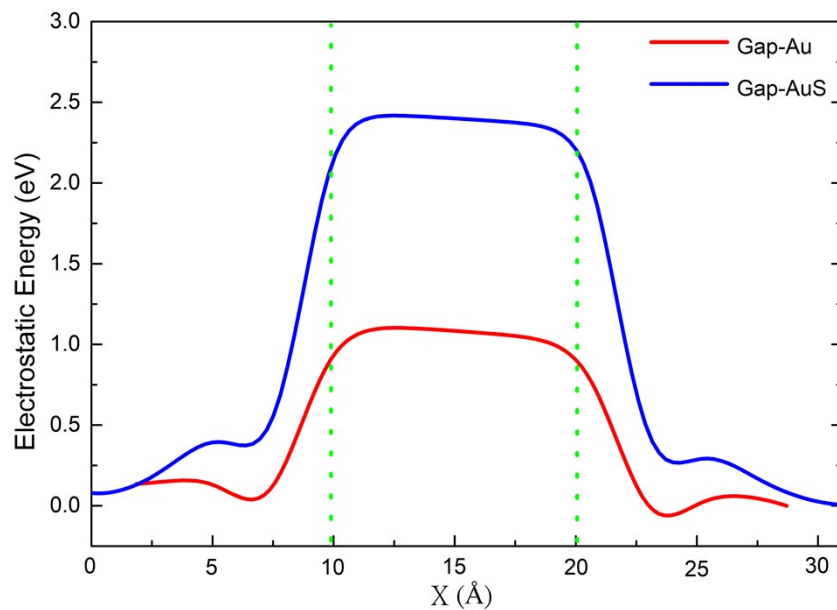

**Fig S4.** Electrostatic energy of Gap-Au (red line) and Gap-AuS (blue line), without nucleobase in the nanogap. The X axis indicates the direction of the electron transport, and the green dashed lines mark the edge of electrodes.

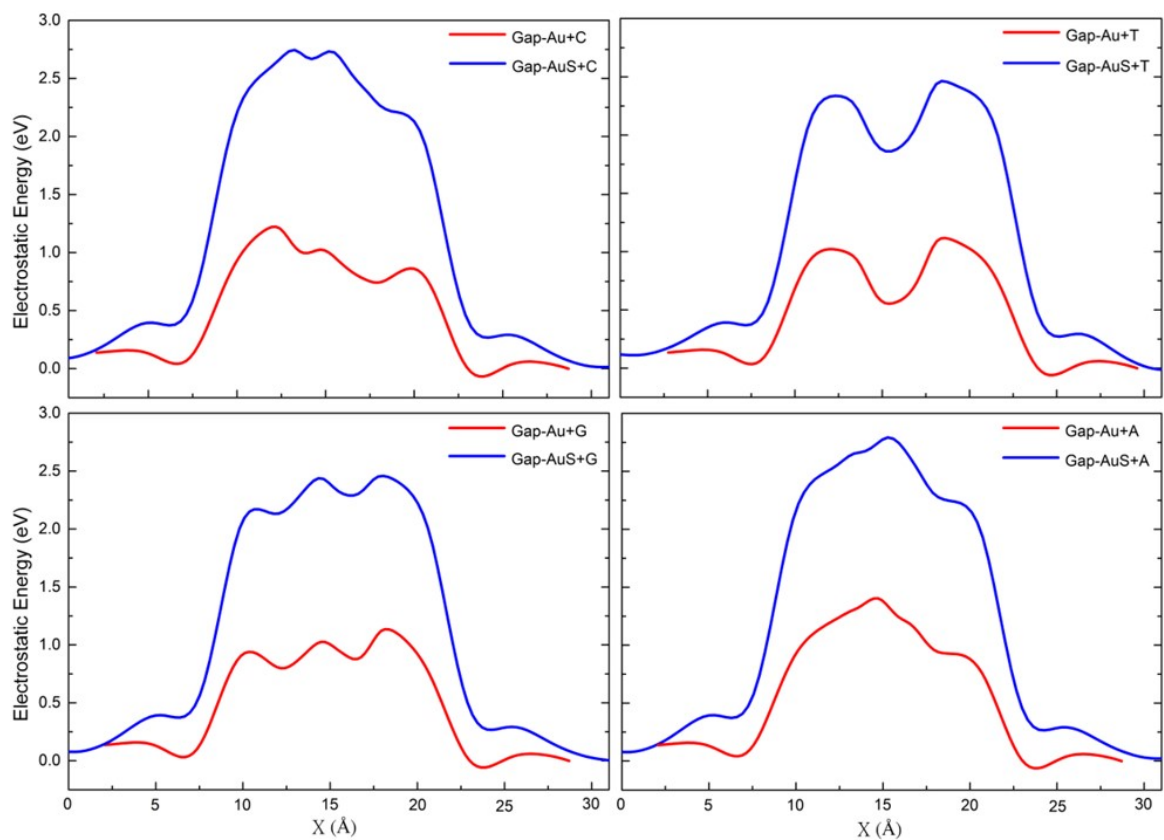

**Fig S5.** Electrostatic energy of Gap-Au (red line) and Gap-AuS (blue line), with each nucleobase in the nanogap.

## Transmission and PDOS for different orientations

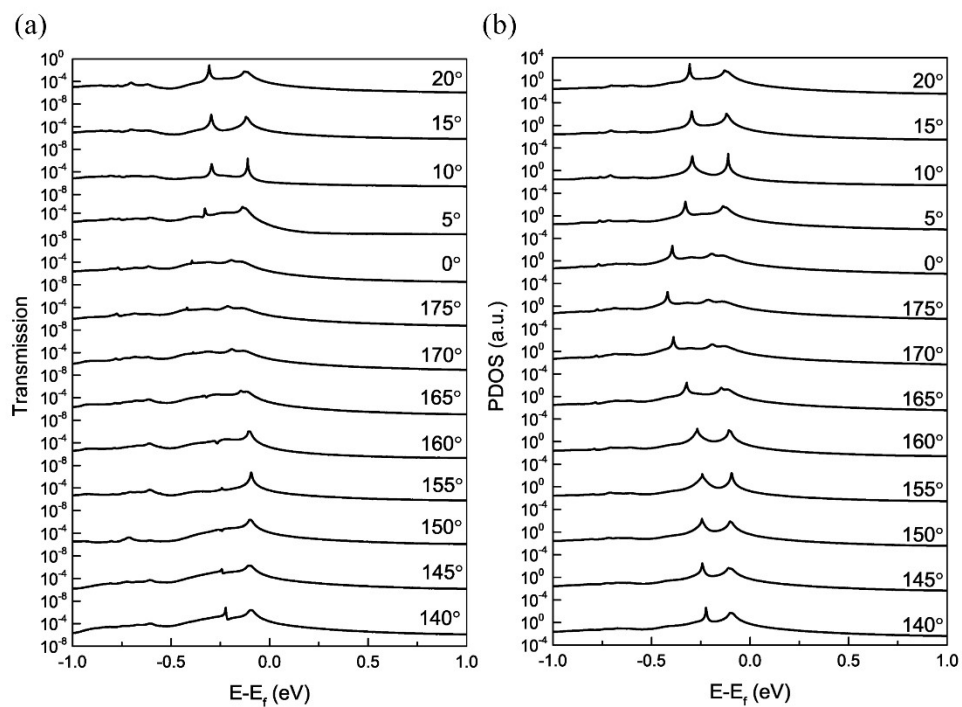

**Fig S6.** Transmission coefficients (a) and PDOS (b) of each orientation which contributes to average current for guanine in Gap-AuS. DOS of electrodes is excluded for clarity.

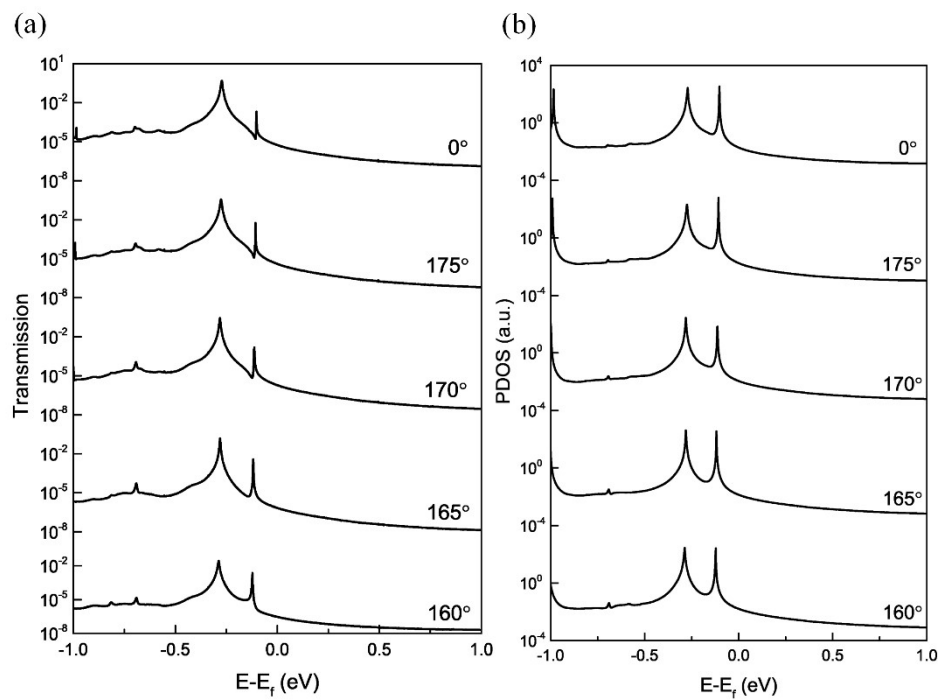

**Fig S7.** Transmission coefficients (a) and PDOS (b) of each orientation which contributes to average current for adenine in Gap-AuS. DOS of electrodes is excluded for clarity.



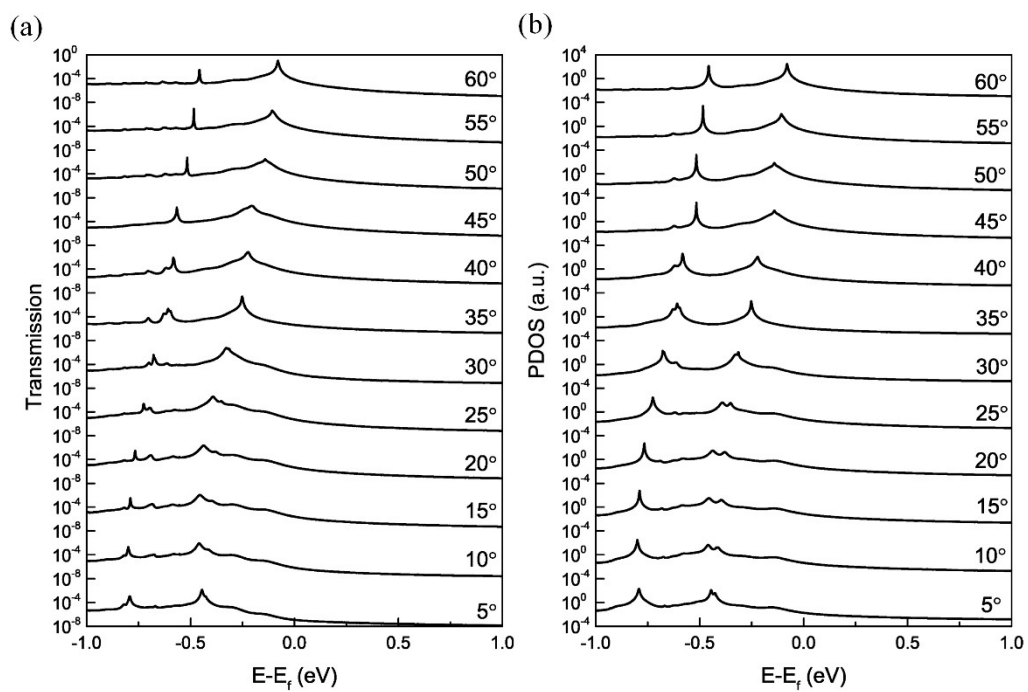

**Fig S8.** Transmission coefficients (a) and PDOS (b) of each orientation which contributes to average current for cytosine in Gap-AuS. DOS of electrodes is excluded for clarity.

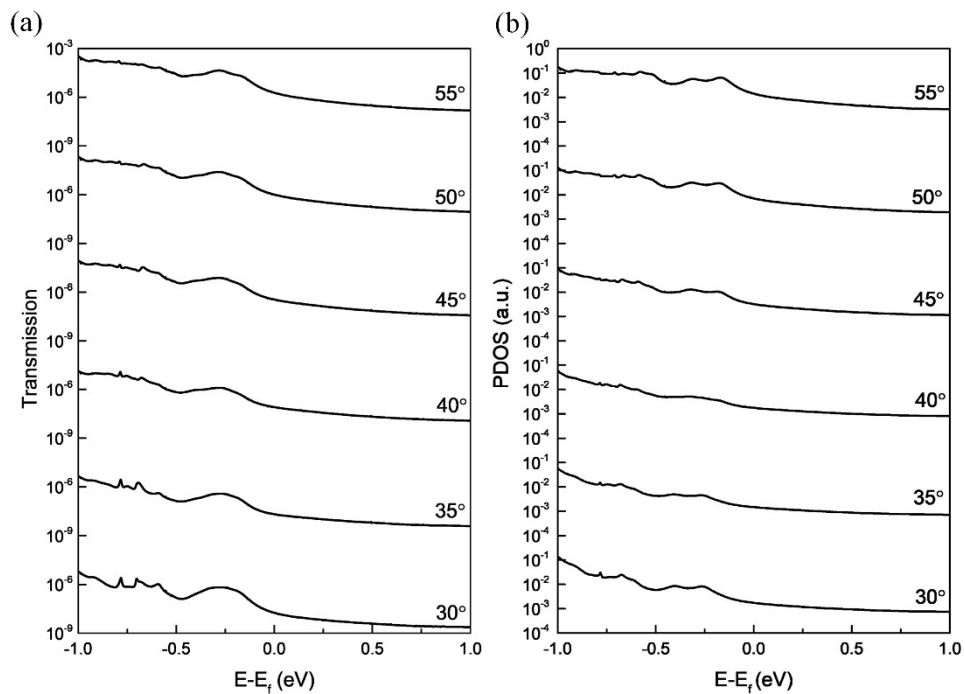

**Fig S9.** Transmission coefficients (a) and PDOS (b) of each orientation which contributes to average current for thymine in Gap-AuS. DOS of electrodes is excluded for clarity.

Table S2. Relative energy of nucleobases in Gap-Au at different orientations

| Relative energy (eV) | Guanine | Adenine | Cytosine | Thymine |
|----------------------|---------|---------|----------|---------|
| 0°                   | 0.107   | 0.215   | 0.111    | 0.198   |
| 5°                   | 0.115   | 0.266   | 0.085    | 0.186   |
| 10°                  | 0.100   | 0.264   | 0.064    | 0.167   |
| 15°                  | 0.082   | 0.248   | 0.048    | 0.143   |
| 20°                  | 0.080   | 0.215   | 0.033    | 0.115   |
| 25°                  | 0.081   | 0.179   | 0.015    | 0.092   |
| 30°                  | 0.064   | 0.143   | 0.000    | 0.066   |
| 35°                  | 0.031   | 0.117   | 0.002    | 0.042   |
| 40°                  | 0.000   | 0.117   | 0.028    | 0.017   |
| 45°                  | 0.003   | 0.151   | 0.067    | 0.002   |
| 50°                  | 0.075   | 0.202   | 0.119    | 0.000   |
| 55°                  | 0.226   | 0.254   | 0.169    | 0.025   |
| 60°                  | 0.452   | 0.300   | 0.211    | 0.087   |
| 65°                  | 0.731   | 0.349   | 0.247    | 0.193   |
| 70°                  | 1.040   | 0.349   | 0.274    | 0.331   |
| 75°                  | 1.385   | 0.405   | 0.294    | 0.457   |
| 80°                  | 1.753   | 0.462   | 0.307    | 0.532   |
| 85°                  | 2.155   | 0.496   | 0.315    | 0.551   |
| 90°                  | 2.553   | 0.498   | 0.318    | 0.547   |
| 95°                  | 2.793   | 0.477   | 0.315    | 0.550   |
| 100°                 | 2.733   | 0.441   | 0.309    | 0.542   |
| 105°                 | 2.527   | 0.397   | 0.303    | 0.493   |
| 110°                 | 2.401   | 0.346   | 0.295    | 0.400   |
| 115°                 | 2.402   | 0.286   | 0.278    | 0.290   |
| 120°                 | 2.387   | 0.217   | 0.265    | 0.204   |
| 125°                 | 2.323   | 0.152   | 0.242    | 0.156   |
| 130°                 | 1.968   | 0.098   | 0.216    | 0.141   |
| 135°                 | 1.423   | 0.058   | 0.188    | 0.146   |
| 140°                 | 0.961   | 0.025   | 0.161    | 0.159   |
| 145°                 | 0.639   | 0.005   | 0.137    | 0.173   |
| 150°                 | 0.409   | 0.000   | 0.121    | 0.182   |
| 155°                 | 0.235   | 0.014   | 0.120    | 0.190   |
| 160°                 | 0.111   | 0.039   | 0.114    | 0.192   |
| 165°                 | 0.036   | 0.079   | 0.118    | 0.197   |
| 170°                 | 0.008   | 0.120   | 0.133    | 0.202   |
| 175°                 | 0.027   | 0.167   | 0.141    | 0.205   |
| 180°                 | 0.091   | 0.210   | 0.134    | 0.201   |

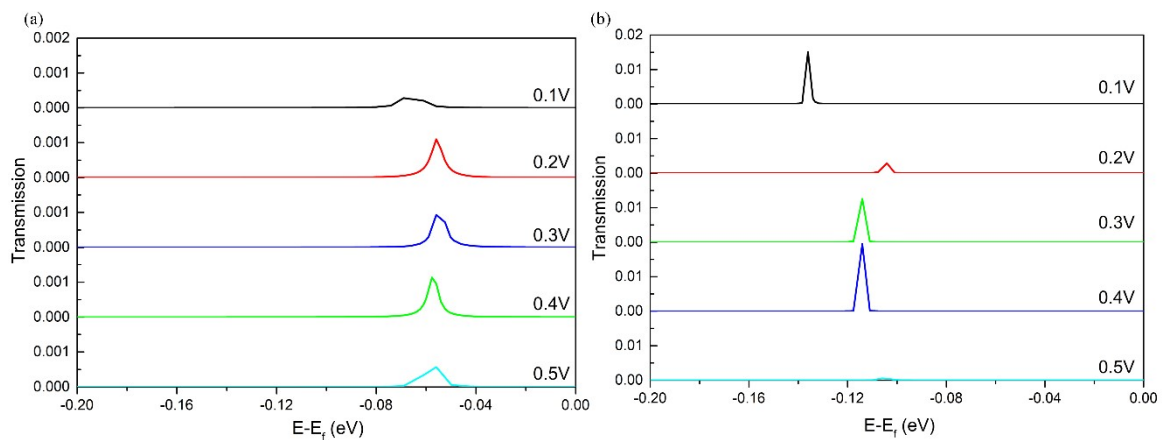

Fig. S10 Transmission of guanine-45° (a) and cytosine-5° (b) at different bias voltages within Gap-AuS'.

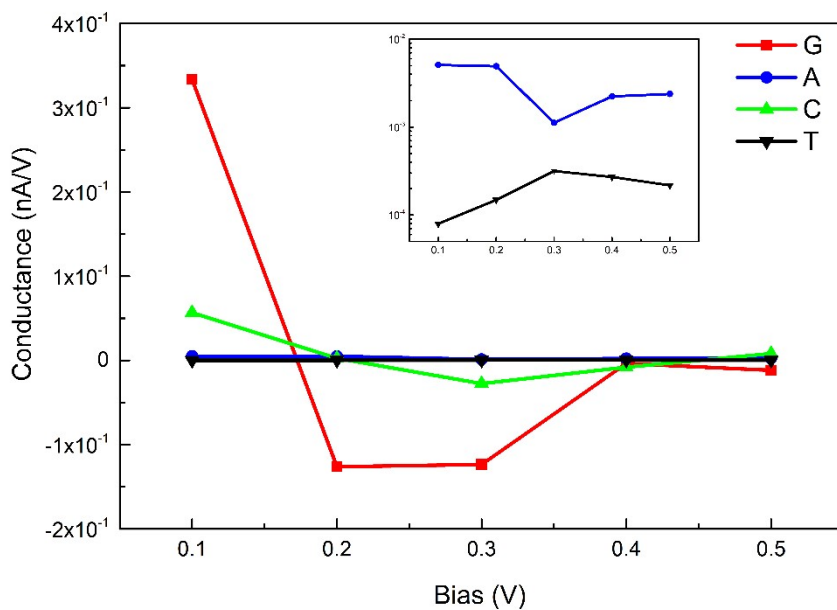

Fig. S11 Conductance-voltage curve for all the nucleobases in Gap-AuS'. Inset is the conductance-voltage curve plotted on a semilogarithmic scale for adenine and thymine.
